# Supplementary material for: A simple and innovative sample preparation method for on-site SARS-CoV-2 molecular diagnostics
Source: Royal Society of Chemistry journal article supplement (doi:10.1039/d1an01401c), 2021-01-01
Supplement: d1an01401c1.pdf [file d1an01401c1.pdf]

## **Appendix A.**

### **Supplementary material**

#### **A simple and innovative sample preparation method for on-site SARS-CoV-2 molecular diagnostics**

**Songhyun Lee<sup>a</sup>, Junkyu Song<sup>b</sup>, Sanghyo Kim<sup>†a</sup>**

a. Department of Bionanotechnology, Gachon University, Seongnam, 13120, Republic of Korea.

b. Philmedi R&D Center, Philmedi Ltd., Seongnam, 13120, Republic of Korea.

**\*Corresponding Author:** Prof. Sanghyo Kim, E-mail: samkim@gachon.ac.kr,

Tel: +82-31-750-8554; Fax: +82-31-750-8819.

**Fig. S1. RT-LAMP reaction with lysis buffer diluent.**

- (a) The amplification plot of yellow colors are the reaction with 1/5 lysis buffer A diluent, light green colors are with 1/50 lysis buffer A diluent, green colors are with 1/500 lysis buffer A diluent, and the purple colors are with negative control.
- (b) The amplification plot of yellow colors are the reaction with 1/5 lysis buffer B diluent, light green colors are with 1/50 lysis buffer B diluent, green colors are with 1/500 lysis buffer B diluent, and the purple colors are with negative control.

**Fig. S2. qPCR amplification plot with different elution volume.**

- (a) The amplification plot is with 300  $\mu\text{L}$  elution volume with optimized single wash protocol. The amplification plot of yellow colors are the reaction with 300  $\mu\text{L}$  eluent, the light green colors are with 1/10 diluent of the eluent, the green colors are with 1/100 diluent of 300  $\mu\text{L}$  eluent, and the blue colors are with 1/k diluent of 300  $\mu\text{L}$  eluent.
- (b) The amplification plot is with 1100  $\mu\text{L}$  elution volume with optimized single wash protocol. The amplification plot of yellow colors are the reaction with 1100  $\mu\text{L}$  eluent, the light green colors are with 1/10 diluent of 1100  $\mu\text{L}$  eluent, the green colors are with 1/100 diluent of 1100  $\mu\text{L}$  eluent, and the blue colors are with 1/k diluent of 1100  $\mu\text{L}$  eluent.

**Fig. S3. PCR differences by silica-coated bead volume.**

The silica-coated bead enriches the DNA concentration over 200%. Maximum enrichment was achieved with 40  $\mu\text{L}$  of beads ( $R^2=0.92$ ).

**Table S1. Usual properties of membranes.**

Fig. S1.

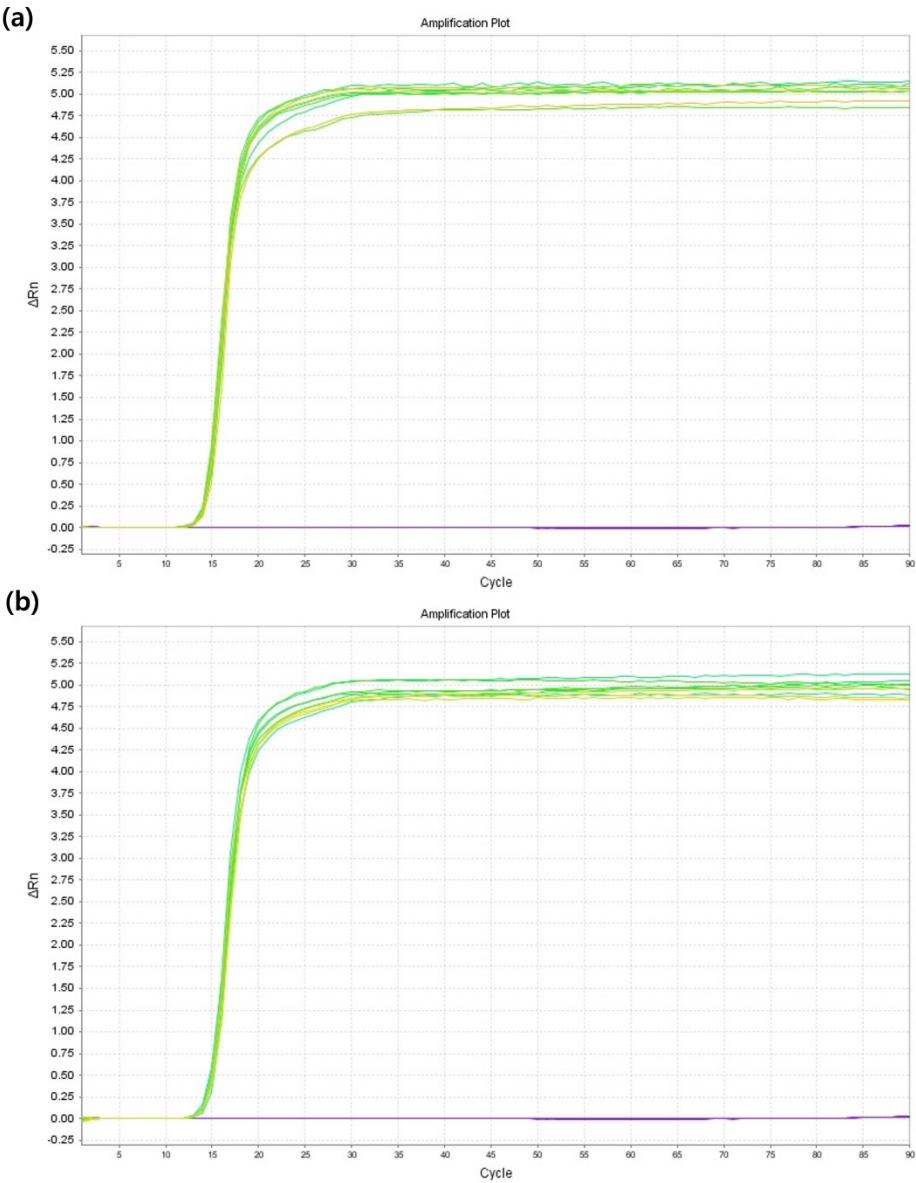

**Fig. S2.**

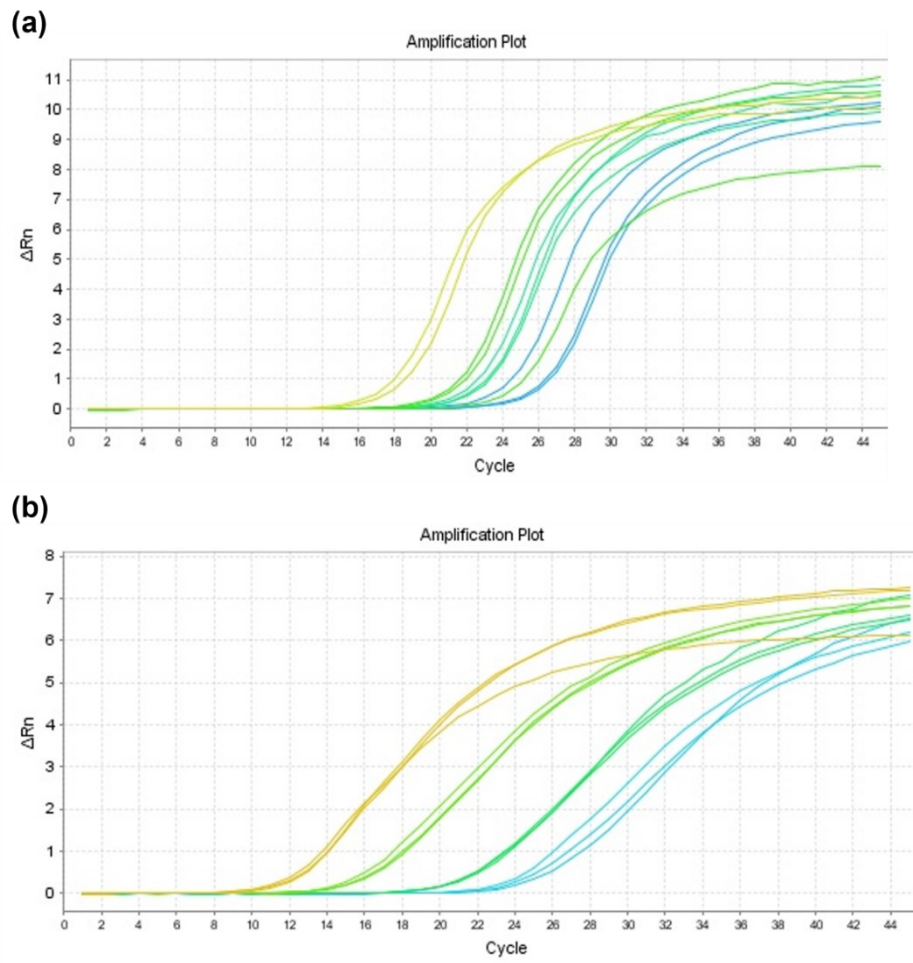

Fig. S3.

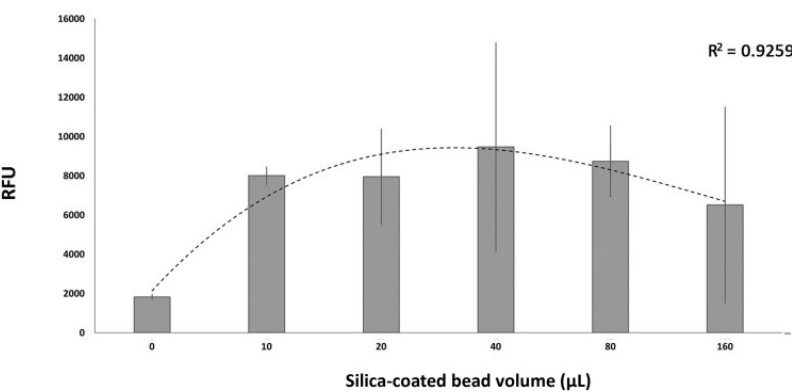

**Table S1.**

| #  | Name                     | Manufacturer  | Basic weight (g/m <sup>2</sup> ) | Thickness (mm) | Retention weight (μm) | Pressure drops (mbar) |
|----|--------------------------|---------------|----------------------------------|----------------|-----------------------|-----------------------|
| 1  | Glass filter GF/F        | Whatman       | N/A                              | 0.42           | 0.7                   | N/A                   |
| 2  | Glass filter GF/D        | Whatman       | N/A                              | 0.67           | 2.7                   | N/A                   |
| 3  | Glass filter GC-50       | ADVANTEC      | 53                               | 0.19           | 0.5                   | N/A                   |
| 4  | Silica membrane          | Biocomma      | N/A                              | N/A            | N/A                   | N/A                   |
| 5  | Glass filter (grade 141) | Boreda        | N/A                              | N/A            | N/A                   | N/A                   |
| 6  | GF-A                     | Hyundai Micro | 52                               | 0.23           | 1.6                   | 38                    |
| 7  | GF-B                     | Hyundai Micro | 143                              | 0.7            | 1                     | 95                    |
| 8  | GF-C                     | Hyundai Micro | 52                               | 0.24           | 1.2                   | 55                    |
| 9  | GF-D                     | Hyundai Micro | 120                              | 0.53           | 2.7                   | 140                   |
| 10 | GF-E                     | Hyundai Micro | 75                               | 0.45           | 0.7                   | 120                   |
| 11 | Conjugation pad          | N/A           | 75                               | N/A            | N/A                   | N/A                   |
| 12 | Cellulose pad            | Biocomma      | N/A                              | N/A            | N/A                   | N/A                   |
| 13 | Silica membrane          | Biocomma      | N/A                              | N/A            | N/A                   | N/A                   |
|    | Chromatography paper     | Whatman       | N/A                              | N/A            | N/A                   | N/A                   |
